# Supplementary material for: An allosteric inhibitor of RhoGAP class-IX myosins suppresses the metastatic features of cancer cells
Source: Nat Commun. 2024 Nov 16;15:9947. doi: 10.1038/s41467-024-54181-6 (PMC11569205; doi:10.1038/s41467-024-54181-6)
Supplement: Supplementary file 2 — Description of Additional Supplementary Files [file 41467_2024_54181_MOESM2_ESM.pdf]

# **An allosteric inhibitor of RhoGAP class-IX myosins suppresses the metastatic features of cancer cells**

Despoina Kyriazi<sup>1</sup>, Lea Voth<sup>1</sup>, Almke Bader<sup>1</sup>, Wiebke Ewert<sup>1,2</sup>, Juliane Gerlach<sup>3</sup>, Kerstin Elfrink<sup>4</sup>, Peter Franz<sup>1</sup>, Mariana I. Tsap<sup>5</sup>, Bastian Schirmer<sup>6</sup>, Julia Damiano-Guercio<sup>1</sup>, Falk K. Hartmann<sup>1</sup>, Masina Plenge<sup>7</sup>, Azam Salari<sup>8</sup>, Dennis Schoettelndreier<sup>1</sup>, Katharina Strienke<sup>1</sup>, Nadine Bresch<sup>1</sup>, Claudio Salinas<sup>1</sup>, Herwig O. Gutzeit<sup>9,§</sup>, Nora Schaumann<sup>10</sup>, Kais Hussein<sup>11</sup>, Heike Bähre<sup>12</sup>, Inga Brüschi<sup>13</sup>, Peter Claus<sup>14</sup>, Detlef Neumann<sup>6,§</sup>, Manuel H. Taft<sup>1§</sup>, Halyna R. Shcherbata<sup>5,§</sup>, Anaclet Ngezahayo<sup>7,§</sup>, Martin Bähler<sup>4,§</sup>, Mahdi Amiri<sup>8,§</sup>, Hans-Joachim Knölker<sup>3,§</sup>, Matthias Preller<sup>1,2,§</sup>, and Georgios Tsiavalariis<sup>1,15,§,\*</sup>

## **DESCRIPTION TO SUPPLEMENTARY DATA**

- Supplementary movie legends
- Description of Supplementary Data 1

## **SUPPLEMENTARY MOVIE LEGENDS**

**Supplementary Movie 1. Adhibin causes the detachment of A459 and MLE-12 cells.** A549 and MLE-12 cells treated with 1% DMSO or 25  $\mu$ M adhibin and imaged on glass-bottom dishes using brightfield microscopy and a 60x objective. Time is indicated in hr:min. Scale bar: 20  $\mu$ m.

**Supplementary Movie 2. Adhibin impairs B16-F1 spreading.** Untreated control B16-F1 cells and 1% DMSO or 5  $\mu$ M adhibin treated B16-F1 cells, were imaged in phase contrast to monitor spreading on laminin-coated glass-bottom dishes using a 10x objective. Time is indicated in min:sec. Scale bar is 100  $\mu$ m.

**Supplementary Movie 3. Adhibin impairs B16-F1 random migration.** Untreated control B16-F1 cells and 1% DMSO, 5  $\mu$ M, or 10  $\mu$ M adhibin treated B16-F1 cells, were imaged in DIC to monitor random migration on laminin-coated glass-bottom dishes using a 10x objective. Time is indicated in hr:min. Scale bar is 100  $\mu$ m.

**Supplementary Movie 4. Adhibin impairs B16-F1 lamellipodia architecture and dynamics.** 1% DMSO or 5  $\mu$ M adhibin treated B16-F1 cells, were imaged with bright field microscopy to closely resolve the lamellipodium on laminin-coated glass-bottom dishes using a 60x objective. B16-F1 cells were also transfected with mscarlet-LifeAct, treated with 1% DMSO or 5  $\mu$ M adhibin and imaged using TIRF-microscopy on laminin-coated glass-bottom dishes using a 60x objective. For FRAP experiments, B16-F1 cells were transfected with EGPF- $\beta$ -actin, treated with 1% DMSO or 5  $\mu$ M adhibin and imaged using confocal microscopy on laminin-coated glass-bottom dishes using a 63x objective. The area was bleached for 0.5ms. Time is indicated in min:sec. Scale bar is 5  $\mu$ m. Time is indicated in min:sec. Scale bar: 20  $\mu$ m.

**Supplementary Movie 5. Adhibin affects Rho localization in B16-F1 cells.** B16-F1 cells were transfected with dtomato-rhotekin, treated with 1% DMSO or 5  $\mu$ M adhibin and imaged using TIRF-microscopy on laminin-coated glass-bottom dishes using a 60x objective. Time is indicated in min:sec. Scale bar: 20  $\mu$ m.

**Supplementary Movie 6. Adhibin impairs cell division.** B16-F1 cells were treated with 1% DMSO or 5  $\mu$ M adhibin and imaged on laminin-coated glass-bottom dishes with DIC microscopy using a 10x objective and with brightfield microscopy using a 60x objective. Time is indicated in hours:min:sec. Scale bar: 20  $\mu$ m.

## **DESCRIPTION OF SUPPLEMENTARY DATA 1 HOMOLOGY MODELS**

**Homology Model 1.** Homology model of *RnMyo9a*.

**Homology Model 2.** Homology model of *RnMyo9a* in complex with adhibin.

**Homology Model 3.** Homology model of *RnMyo9b*.

**Homology Model 4.** Homology model of *RnMyo9b* in complex with adhibin.
